# Supplementary material
Source: Springer Nature journal article supplement (https://www.springermedizin.de/resource/supplementary/12874_2010_474_MOESM5_ESM.pdf/9432178)

Prevalence of non-English speaking country of birth

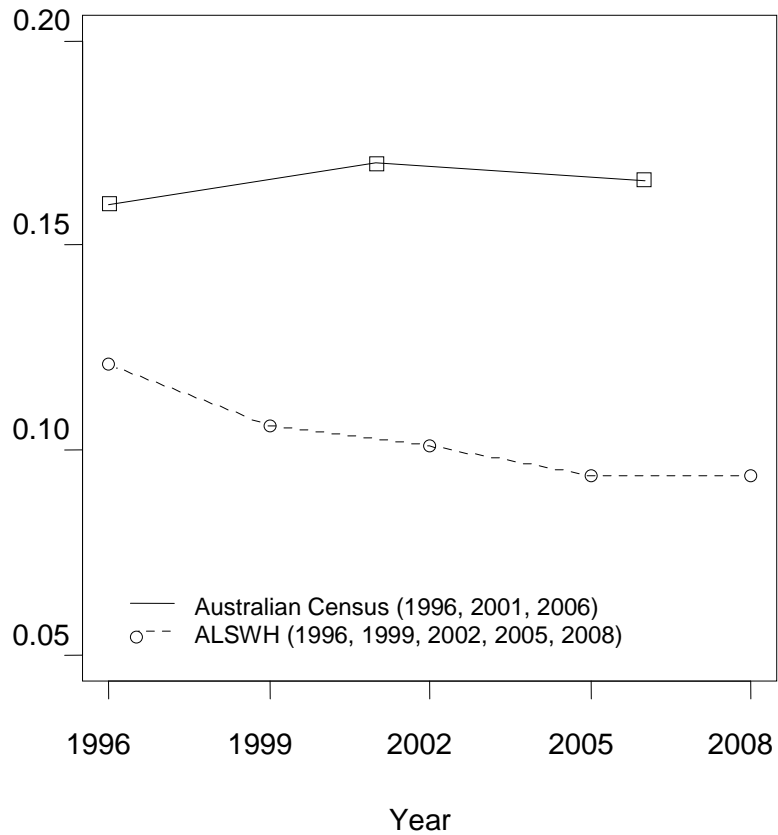

Prevalence of current and ex-smokers

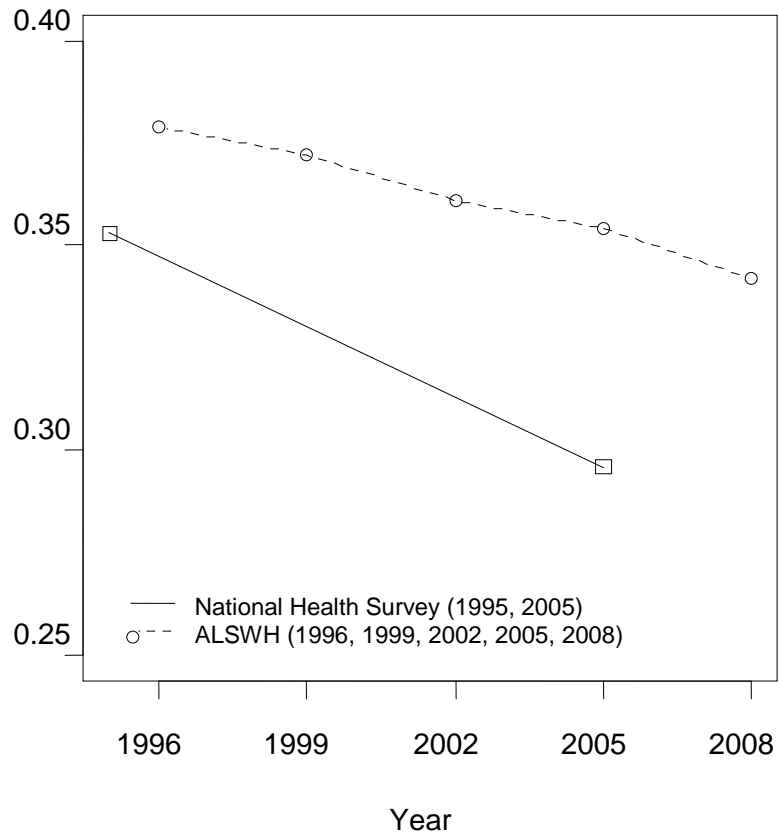

Supplement: MOESM5 [file 9432178]
